# Supplementary material
Source: MDPI journal article supplement (https://www.mdpi.com/2075-163X/12/5/542)
Supplement: s1 [file s1]

# Na-Alternative to Tinsleyite Obtained under Hydrothermal Conditions: Crystal Structure and Comparative Crystal Chemistry

Olga Yakubovich <sup>1,\*</sup>, Galina Kiriukhina <sup>1,2</sup>, Polina Verchenko <sup>1</sup>, Sergei Simonov <sup>3</sup>, Anatoly Volkov <sup>1</sup> and Olga Dimitrova <sup>1</sup>

**Table S1.** Fractional atomic coordinates and isotropic or equivalent isotropic displacement parameters ( $\text{\AA}^2$ ) for  $\text{Na}_2\text{Al}_2\text{O}(\text{PO}_4)_2 \cdot 0.12\text{H}_2\text{O}$ .

|      | <i>x</i>      | <i>y</i>     | <i>z</i>     | <i>U</i> <sub>iso</sub> */ <i>U</i> <sub>eq</sub> | Occ. (< 1) |
|------|---------------|--------------|--------------|---------------------------------------------------|------------|
| P1   | −0.09688 (4)  | 0.88033 (4)  | 0.64790 (4)  | 0.00531 (8)                                       |            |
| P2   | 0.36894 (4)   | 0.62263 (4)  | 0.60107 (4)  | 0.00562 (8)                                       |            |
| Al1  | 0.11711 (5)   | 0.40130 (5)  | 0.55369 (5)  | 0.00530 (9)                                       |            |
| Al2  | 0.18162 (5)   | 0.68842 (5)  | 0.78063 (5)  | 0.00545 (9)                                       |            |
| Na1  | 0.77484 (14)  | 0.5582 (3)   | 0.7802 (2)   | 0.0132 (4)                                        | 0.930 (12) |
| Na1' | 0.7612 (19)   | 0.523 (3)    | 0.807 (3)    | 0.0132 (4)                                        | 0.070 (12) |
| Na2  | 0.45030 (7)   | 0.28310 (8)  | 0.56427 (8)  | 0.01594 (14)                                      |            |
| O1   | −0.06181 (11) | 0.41235 (11) | 0.39508 (11) | 0.00654 (19)                                      |            |
| O2   | −0.14023 (12) | 1.04509 (12) | 0.60626 (11) | 0.0081 (2)                                        |            |
| O3   | 0.07392 (12)  | 0.86257 (12) | 0.72444 (12) | 0.00759 (19)                                      |            |
| O4   | −0.16734 (12) | 0.78916 (12) | 0.49913 (11) | 0.00739 (19)                                      |            |
| O5   | −0.15697 (12) | 0.81896 (12) | 0.75910 (12) | 0.0076 (2)                                        |            |
| O6   | 0.31578 (12)  | 0.72787 (12) | 0.46346 (12) | 0.0093 (2)                                        |            |
| O7   | 0.33626 (12)  | 0.69011 (13) | 0.73005 (12) | 0.0112 (2)                                        |            |
| O8   | 0.53386 (12)  | 0.59611 (13) | 0.66082 (13) | 0.0125 (2)                                        |            |
| O9   | 0.28443 (12)  | 0.47053 (12) | 0.54952 (13) | 0.0094 (2)                                        |            |
| O10  | 0.500000      | 0.000000     | 0.500000     | 0.081 (14)                                        | 0.121 (11) |
